# Supplementary material for: Risk of Tuberculosis Caused by Fluticasone Propionate versus Budesonide in Chronic Obstructive Pulmonary Disease: A Nationwide Population-Based Study
Source: MDPI journal article supplement (doi:10.3390/jpm12071189), 2022-07-21
Supplement: s1 [file s1]

**Table S1.** Baseline characteristics of unmatched study subjects

|                                                   | Fluticasone propionate<br>(n=38,628) |       | Budesonide<br>(n=16,514) |       | p value |
|---------------------------------------------------|--------------------------------------|-------|--------------------------|-------|---------|
|                                                   | n                                    | %     | n                        | %     |         |
| <b>Age (years)</b>                                |                                      |       |                          |       |         |
| Mean (SD)                                         | 64.80 (11.65)                        |       | 62.47 (11.54)            |       | <0.0001 |
| 40-49                                             | 4,584                                | 11.87 | 2,590                    | 15.68 | <0.0001 |
| 50-59                                             | 8,203                                | 21.24 | 4,174                    | 25.28 |         |
| 60-69                                             | 11,262                               | 29.16 | 4,854                    | 29.39 |         |
| 70-79                                             | 10,571                               | 27.37 | 3,716                    | 22.50 |         |
| ≥ 80                                              | 4,008                                | 10.38 | 1,180                    | 7.15  |         |
| <b>Sex</b>                                        |                                      |       |                          |       | 0.0217  |
| Male                                              | 21,494                               | 55.64 | 9,364                    | 56.70 |         |
| Female                                            | 17,134                               | 44.36 | 7,150                    | 43.30 |         |
| <b>Comorbidity</b>                                |                                      |       |                          |       |         |
| Bronchiectasis                                    | 3,482                                | 4.59  | 1,452                    | 4.92  | 0.4036  |
| Diabetes                                          | 13,648                               | 17.98 | 5,215                    | 17.66 | <0.0001 |
| Hypertension                                      | 24,277                               | 31.97 | 9,445                    | 31.99 | <0.0001 |
| Heart failure                                     | 9,344                                | 12.31 | 3,260                    | 11.04 | <0.0001 |
| Stroke                                            | 9,530                                | 12.55 | 3,569                    | 12.09 | <0.0001 |
| Chronic kidney disease                            | 2,259                                | 2.98  | 861                      | 2.92  | 0.0031  |
| Chronic liver disease                             | 13,386                               | 17.63 | 5,720                    | 19.38 | <0.0001 |
| <b>CCI</b>                                        |                                      |       |                          |       |         |
| Mean (SD)                                         | 3.38 (2.19)                          |       | 3.01 (2.08)              |       | <0.0001 |
| <2                                                | 8,135                                | 21.06 | 4,586                    | 27.77 | <0.0001 |
| ≥ 2                                               | 30,493                               | 78.94 | 11,928                   | 72.23 |         |
| <b>Bronchodilator</b>                             |                                      |       |                          |       |         |
| SABA                                              | 712                                  | 1.84  | 1,035                    | 6.27  | <0.0001 |
| LAMA                                              | 5,793                                | 15.00 | 2,231                    | 13.51 | <0.0001 |
| LABA                                              | 29,621                               | 76.68 | 12,134                   | 73.48 | <0.0001 |
| LAMA/LABA                                         | 2,502                                | 6.48  | 1,114                    | 6.75  | 0.2431  |
| <b>OCS prescription</b>                           |                                      |       |                          |       |         |
| Yes                                               | 32,400                               | 87.25 | 13,602                   | 84.65 | <0.0001 |
| No                                                | 4,733                                | 12.75 | 2,467                    | 15.35 |         |
| <b>OCS prescription day</b>                       |                                      |       |                          |       |         |
| Mean (SD)                                         | 13.84 (21.20)                        |       | 10.98 (17.56)            |       | <0.0001 |
| <b>Interval from COPD diagnosis to index date</b> |                                      |       |                          |       |         |
| Mean (SD)                                         | 457.6 (829.7)                        |       | 467.7 (905.8)            |       | 0.2010  |

CCI, Charlson Comorbidity Index; SABA, short-acting  $\beta$ -agonist; LAMA, long-acting muscarinic antagonist; LABA, long-acting  $\beta_2$  agonist; OCS, oral corticosteroid.

**Table S2.** Hazard ratio of tuberculosis according to the ICS use in unmatched study subjects

| Case (n, %)      | ICS type               |                   | Univariate analysis |         | Multivariate analysis |         |
|------------------|------------------------|-------------------|---------------------|---------|-----------------------|---------|
|                  | Fluticasone propionate | Budesonide        | HR (95% CI)         | p value | HR (95% CI)           | p value |
| Total            | 38,628                 | 16,514            |                     |         |                       |         |
| Tuberculosis (-) | 37,949<br>(98.24)      | 16,330<br>(98.89) | 1.00                |         | 1.00                  |         |
| Tuberculosis (+) | 679<br>(1.76)          | 184<br>(1.11)     | 1.44<br>(1.22–1.70) | <0.0001 | 1.21<br>(1.02–1.44)   | 0.0027  |

**Table S3.** Hazard ratio of tuberculosis according to the ICS use

| Variables                | Univariate analysis  |                | Multivariate analysis |                |
|--------------------------|----------------------|----------------|-----------------------|----------------|
|                          | Hazard ratio (95%CI) | <i>P</i> value | Hazard ratio (95%CI)  | <i>P</i> value |
| Total                    | 1.26 (1.04–1.53)     | 0.0180         | 1.28 (1.05–1.60)      | 0.0167         |
| ICS cumulative dose (μg) |                      |                |                       |                |
| 0–15,000 (Q1)            | 0.97 (0.69–1.37)     | 0.8488         | 1.01 (0.69–1.48)      | 0.9523         |
| 15,001–60,000 (Q2)       | 1.16 (0.74–1.80)     | 0.5172         | 1.16 (0.74–1.81)      | 0.5168         |
| 60,001–225,000 (Q3)      | 1.28 (0.82–2.01)     | 0.2756         | 1.25 (0.79–1.97)      | 0.3344         |
| > 225,000 (Q4)           | 1.83 (1.27–2.62)     | 0.0012         | 1.82 (1.27–2.62)      | 0.0012         |
